# Supplementary material for: Determination of cesium ions in environmental water samples with a magnetic multi-walled carbon nanotube imprinted potentiometric sensor
Source: Royal Society of Chemistry journal article supplement (doi:10.1039/d0ra09659h), 2021-01-01
Supplement: d0ra09659h1.pdf [file d0ra09659h1.pdf]

## Determination of Cesium Ions in Environmental Water Samples with a Magnetic Multi-walled Carbon Nanotubes Imprinted Potentiometric Sensor

Zhiming Wang,<sup>a</sup> Long Wang,<sup>a</sup> Cuo Zhou<sup>a</sup> and Chunyan Sun<sup>a,\*</sup>

Table S1. FAAS detection of Cs ion in eluate

|                        |           |                                     |                     |                            |        |          |
|------------------------|-----------|-------------------------------------|---------------------|----------------------------|--------|----------|
| [Cs] Calibration curve |           | 2021/1/16 14:45                     |                     |                            |        |          |
| Curve equation         |           | $[C]=K2[A]^2+K1[A]+K0$              |                     |                            |        |          |
| Equation coefficient   |           | K2=-14.9894, K1=31.8711, K0=-0.0236 |                     |                            |        |          |
| Correlation            |           | 0.99646                             |                     |                            |        |          |
| NO.                    | Abs       | concentration [ppm]                 |                     |                            |        |          |
| 1                      | 0         | 0                                   |                     |                            |        |          |
| 2                      | 0.147     | 4                                   |                     |                            |        |          |
| 3                      | 0.219     | 6                                   |                     |                            |        |          |
| 4                      | 0.265     | 8                                   |                     |                            |        |          |
| 5                      | 0.392     | 10                                  |                     |                            |        |          |
| NO.                    | Sample    | Abs                                 | concentration [ppm] | Actual concentration [ppm] | SD     | RSD[%]   |
| 1                      | STD - Cs1 | 0                                   | 0                   |                            | 0.0007 | -45.5711 |
| 2                      | STD - Cs2 | 0.147                               | 4                   |                            | 0.0006 | 0.3924   |
| 3                      | STD - Cs3 | 0.219                               | 6                   |                            | 0.0008 | 0.3448   |
| 4                      | STD - Cs4 | 0.265                               | 8                   |                            | 0.0046 | 1.7209   |
| 5                      | STD - Cs5 | 0.392                               | 10                  |                            | 0.0049 | 1.2485   |
| 6                      | UNK -Cs1  | 0.013                               | 0.368               | 0.368                      | 0.001  | 7.3975   |
| 7                      | UNK -Cs2  | 0                                   | 0                   | 0                          | 0.0003 | -49.7102 |
| 8                      | UNK -Cs3  | 0                                   | 0                   | 0                          | 0.0002 | -17.8557 |

Table S2. The content of natural mineral impurities in the sample

| Metal ion (mg/L)        | Fe(III) | Al(III) | Sr(III) | Mg(II) | Rb(I) | Ca(II) | Li(I) | Na(I) | K(I) | Cs(I)        |
|-------------------------|---------|---------|---------|--------|-------|--------|-------|-------|------|--------------|
| sample                  |         |         |         |        |       |        |       |       |      |              |
| Brine                   | 161.00  | 4.49    | 0.084   | 9410   | 0.26  | 132    | 1240  | 2080  | 785  | Not detected |
| Beichuan river water    | 9.81    | 0.052   | 87.7    | 1710   | 0.35  | 827    | 1.1   | 3310  | 262  | Not detected |
| Industrial waster water | 6.34    | 1.17    | 24.4    | 2890   | 1.57  | 5500   | 149   | 11700 | 7150 | Not detected |

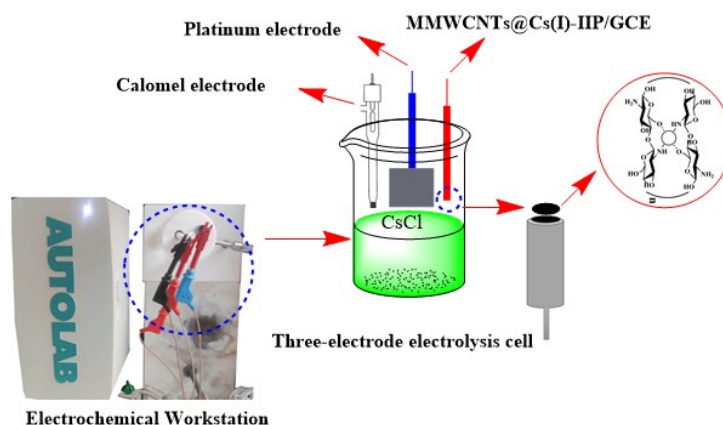

Figure S1. The diagram of the electrochemical cell used for the potentiometer device
